# Supplementary material for: A comparison of speciated atmospheric mercury at an urban center and an upwind rural location
Source: Royal Society of Chemistry journal article supplement (doi:10.1039/b710247j), 2007-10-31

## Supplementary Information

Figure S1. Hourly wind direction measurements made at Devil's Lake State Park (DLSP) between April, 2003 and March, 2004. The measurements were divided into 4 direction classes: East ( $45^{\circ}$  to  $135^{\circ}$ ); South ( $135^{\circ}$  to  $225^{\circ}$ ); West ( $225^{\circ}$  to  $315^{\circ}$ ); and, North ( $315^{\circ}$  to  $45^{\circ}$ ).

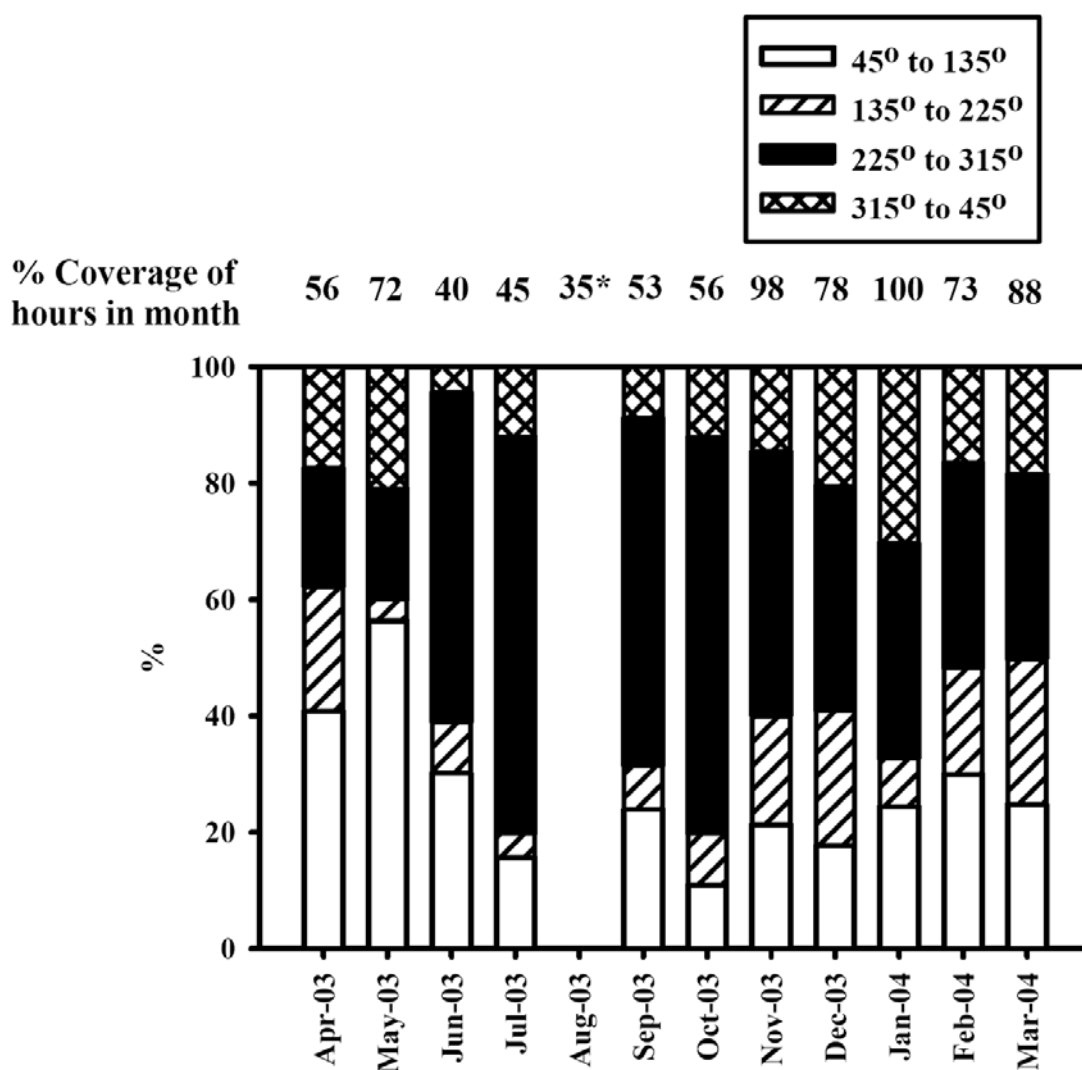

\*Data discarded as less than 40% of month was available.

Figure S2a-h. Time series of atmospheric mercury concentration data for the entire measurement campaign. Figures S2a-d show GEM, PHg, RGM, and RM concentration data measured at Devil's Lake State Park, WI between April 2003 and March 2004. The bold solid lines depict the sections of the data sets during which no point source impacts were observed, and were therefore chosen to calculate reference means and point source thresholds (3 x standard deviation) for the impact estimate calculations. Figures S2e-h show GEM, PHg, RGM, and RM concentration data measured at Milwaukee, WI between July 2004 and May 2005. The reference means and point source thresholds calculated in Figures S2a-d are included in Figures S2e-h.

Figure S2a-d

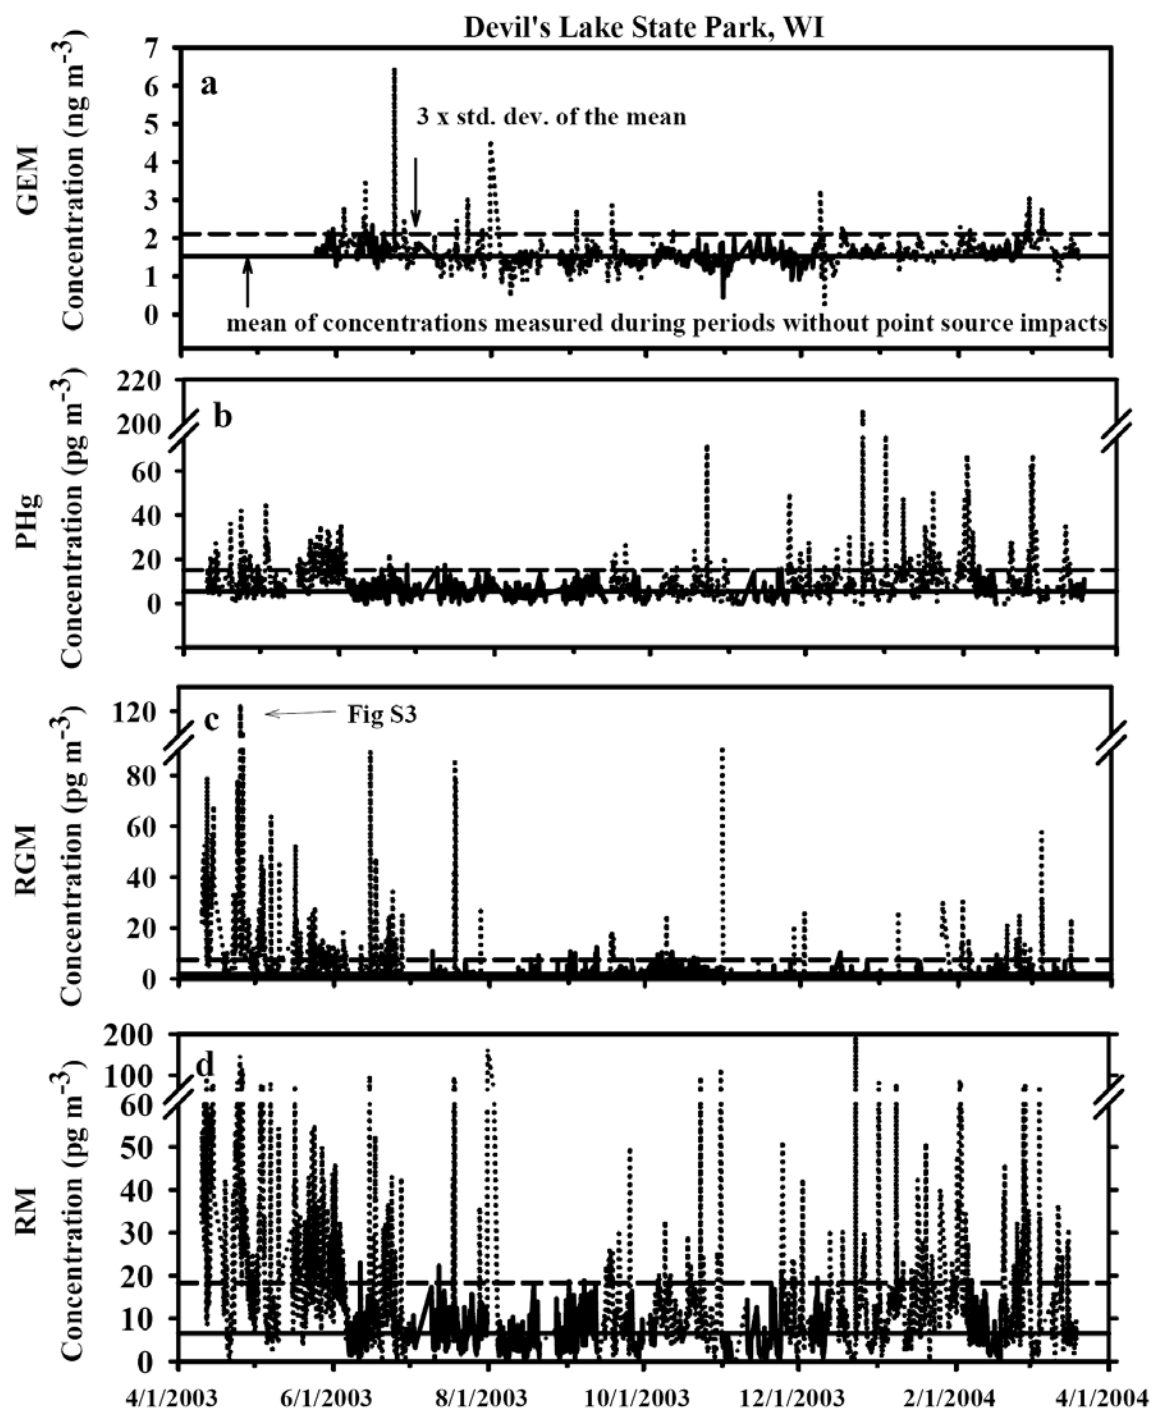

Figure S2e-h

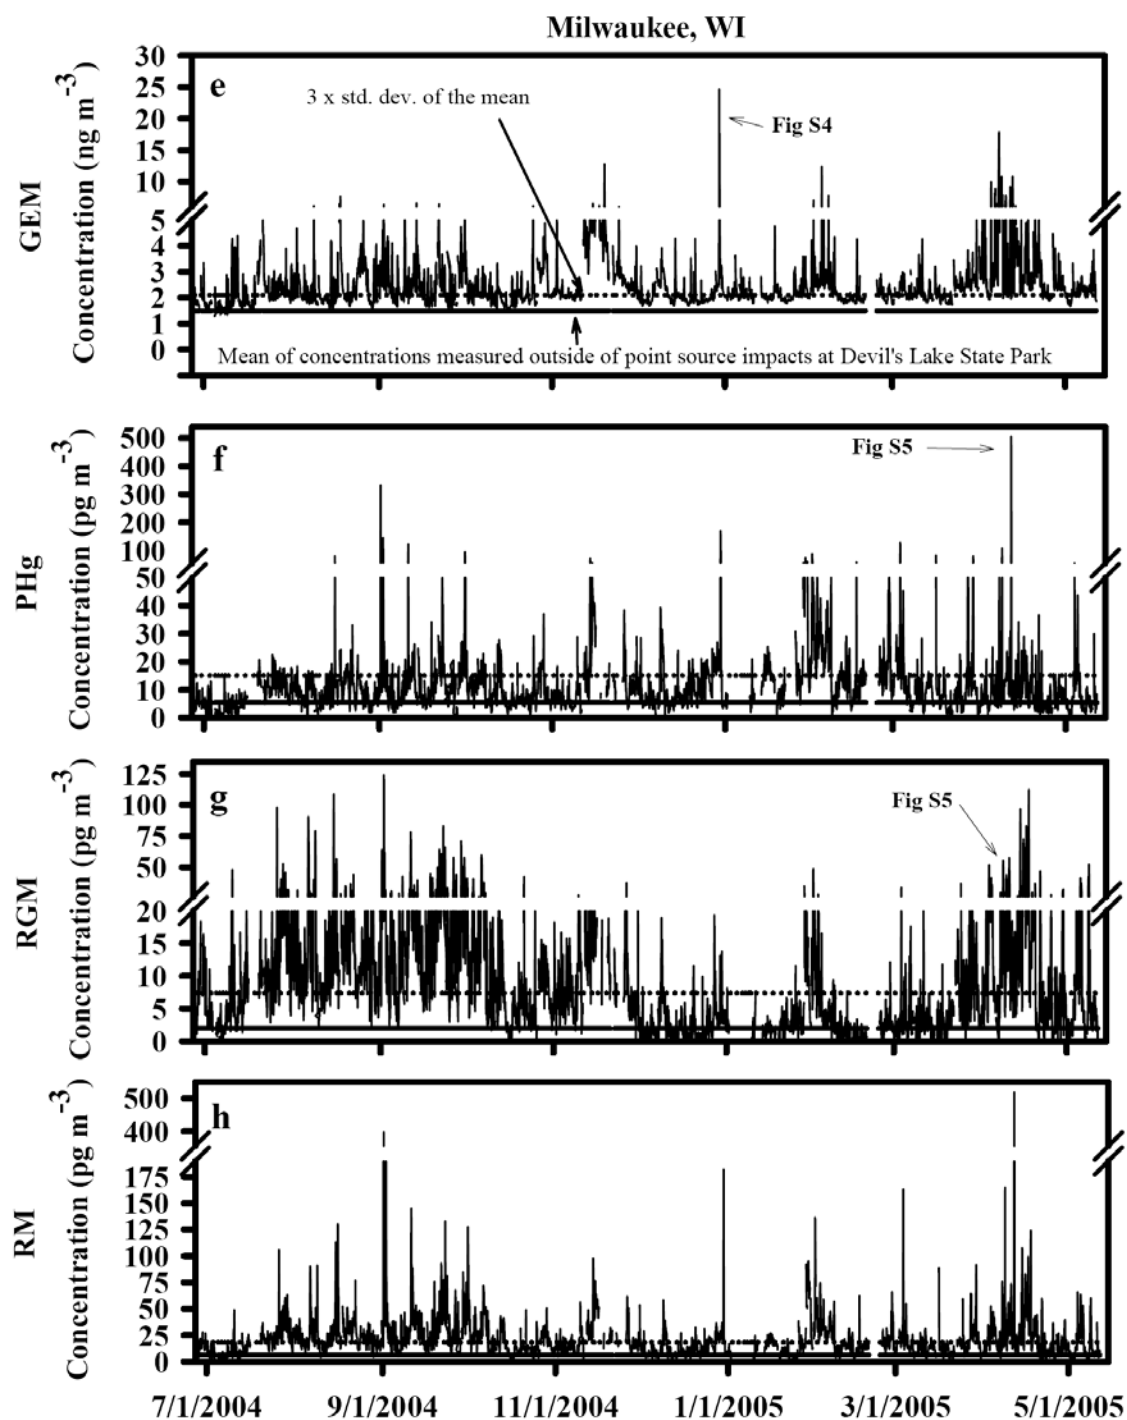

Figure S3. HYSPLIT back trajectory of the air mass that arrived at the Devil's Lake State Park sampling site at 12:00 UTC on May 7<sup>th</sup>, 2003. A short-lived RM concentration increase was seen at the same time (inset; dates labeled at 0:00 hrs UTC of each day). The Electricity Generation Station (EGS) at Pardeeville, WI is listed in the US EPA National Emissions Inventory as a large point source of mercury compounds. This figure demonstrates the likelihood that mercury emissions from the Pardeeville EGS impacted the RM concentrations measured at Devil's Lake State Park.

**NOAA HYSPLIT MODEL**  
**Backward trajectory ending at 12:00 UTC May 7th 2003**  
**EDAS Meteorological Data**

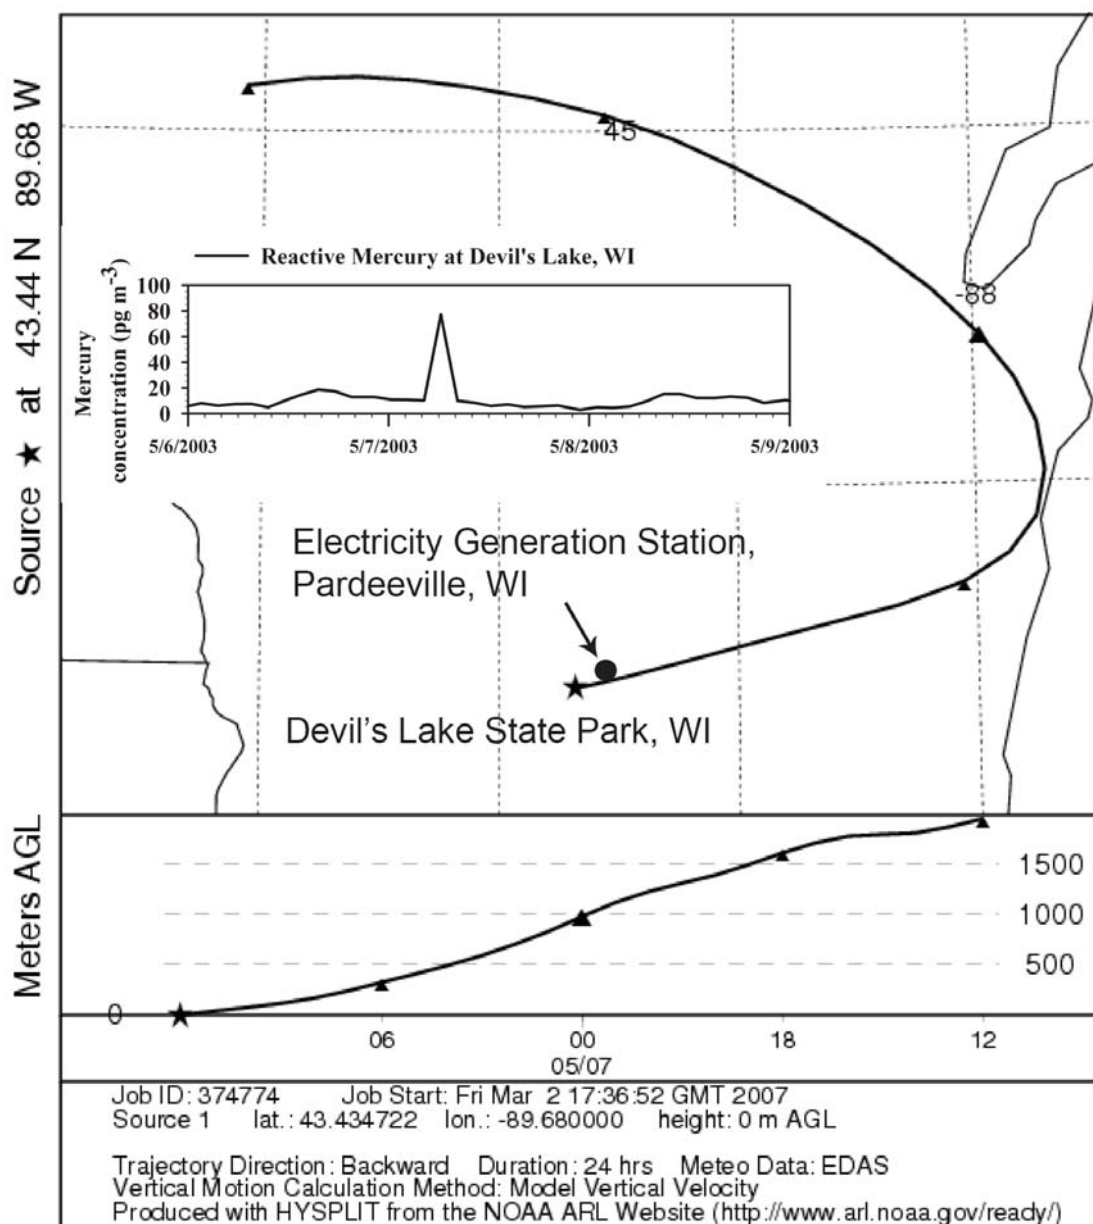

Figure S4. HYSPLIT back trajectory of the air mass that arrived at the Milwaukee sampling site at 06:00 UTC on December 30<sup>th</sup>, 2004. A short-lived GEM concentration increase was seen at the same time (inset; dates labeled at 0:00 hrs UTC of each day). The Electricity Generation Station (EGS), Sheboygan, WI is fueled with coal and therefore, is listed in the US EPA National Emissions Inventory as a large point source of mercury compounds. This figure demonstrates the likelihood that mercury emissions from the Sheboygan EGS impacted the GEM concentrations measured at the sampling location at Milwaukee.

NOAA HYSPLIT MODEL  
Backward trajectory ending at 06:00 UTC December 30th, 2004  
GDAS Meteorological Data

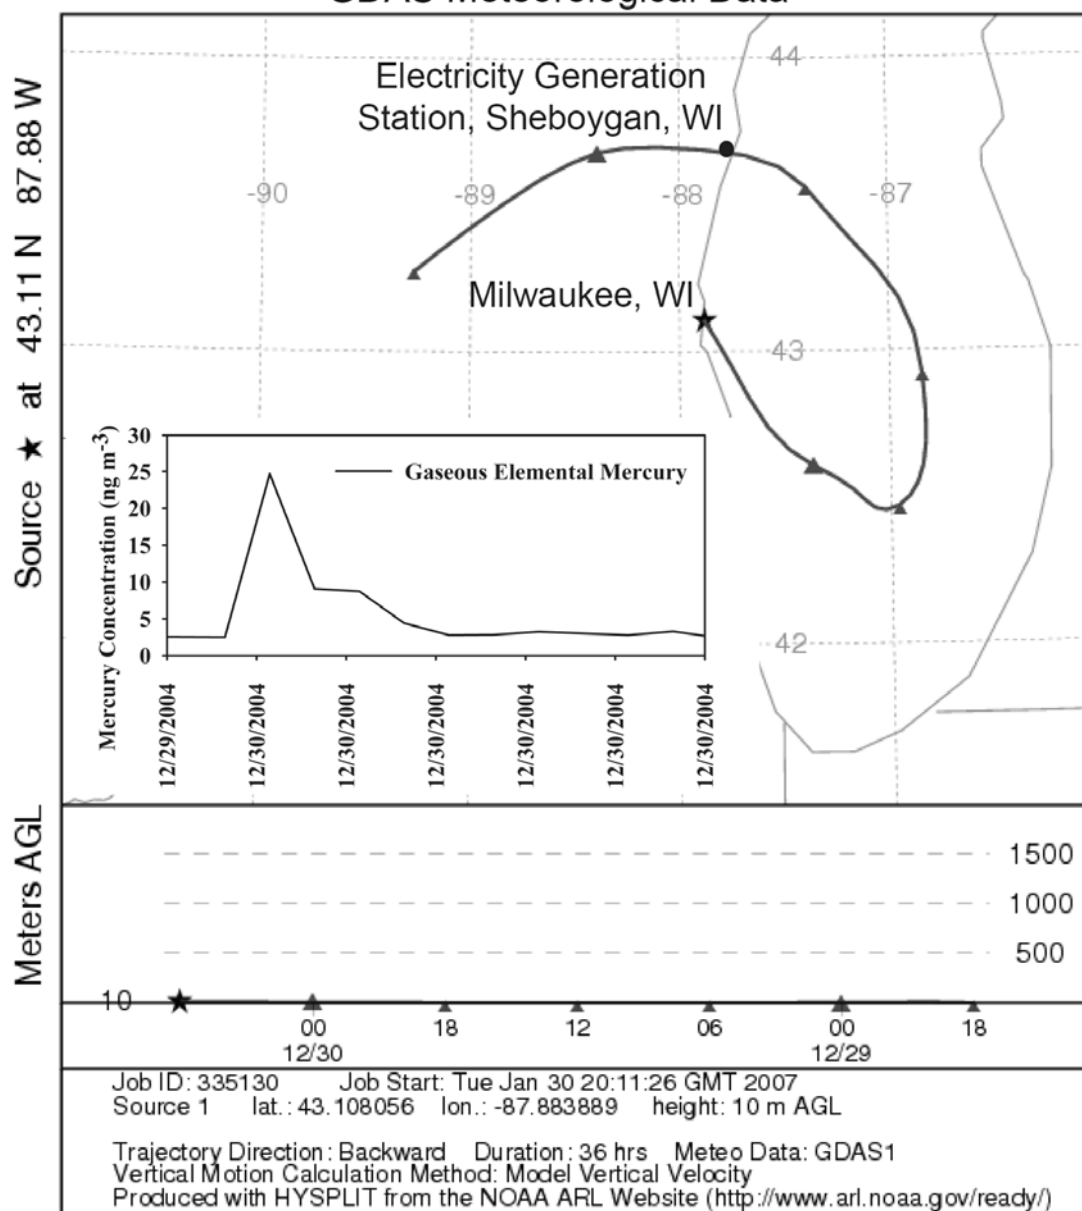

Figure S5. HYSPLIT back trajectory of the air mass that arrived at the Milwaukee sampling site at 20:00 UTC on April 8<sup>th</sup>, 2005. A short-lived increase in reactive mercury concentrations was seen at the same time (inset; dates labeled at 0:00 hrs UTC of each day). The Electricity Generation Station (EGS) at Filer City, MI, is listed in the US EPA National Emissions Inventory as a large point source of mercury compounds. This figure demonstrates the likelihood that the Filer City EGS impacted the reactive mercury concentrations measured at the sampling location at Milwaukee.

NOAA HYSPLIT MODEL  
Backward trajectory ending at 20:00 UTC April 8th, 2005  
GDAS Meteorological Data

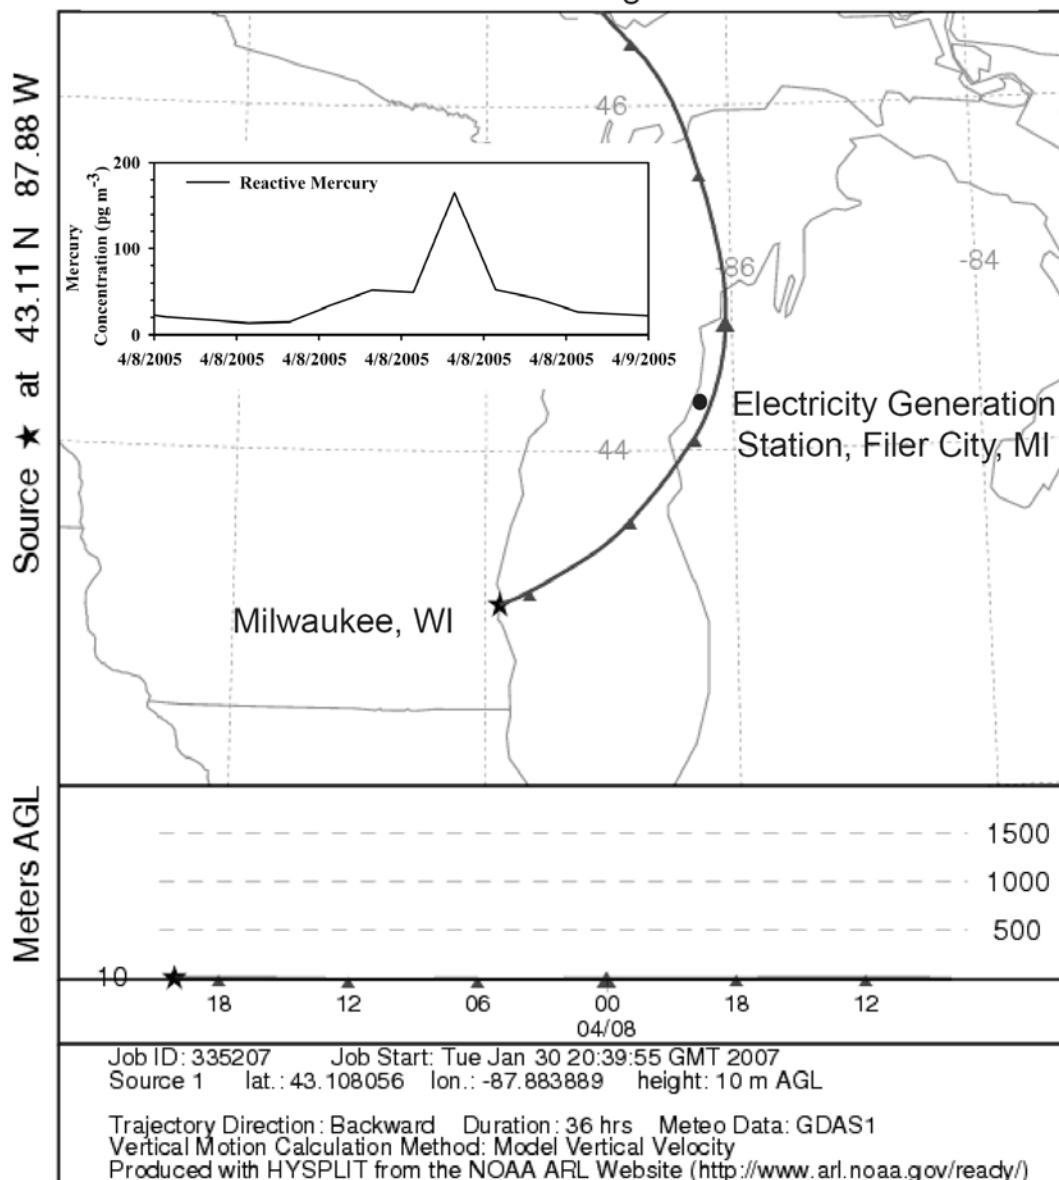

Supplement: b710247j.pdf [file b710247j.pdf]
